# Supplementary material for: Awareness and Barriers to Pre-Exposure Prophylaxis (PrEP) among Commercial Female Sex Workers in Mekelle City, Tigray, Ethiopia: A Cross – Sectional Study, 2025
Source: Research Square preprint supplement (doi:10.21203/rs.3.rs-7415141/v1), 2025-08-26
Supplement: Supplementary file 1 [file 9cdb8c7101bc5e76e83e8534.docx]

## **Questionnaire:**

**Awareness and Barriers to Pre-Exposure Prophylaxis (PrEP) among Commercial Female Sex Workers in Mekelle City, Ethiopia: A Cross – Sectional Study, 2025**

- 1. **Sociodemographic characteristics**

| **Variable** | - **Category and mark** |
| --- | --- |
| Age | _____________ |
| Religion | Orthodox |
| Muslim |
| Protestant |
| Others specify |
| Marital Status | Single |
| Married |
| Divorced |
| Widowed |
| Educational status | Unable to read & write |
| Able to read & write |
| Secondary &above |
| Occupational status | Sex work only |
| Sex work & other |
| Duration in sex work as sex work (years) | ______________ |
| Frequency of sex works in the past 3 months | Several times a day  Daily  Several times a week  Weekly  Rarely  (Specify) _____________ |
| Reasons to be sex worker | Financial problem |
| Conflict with parents |
| Peer pressure |
| Being addicted &others |
| Others(specify) ___________ |
| Monthly income | ______________ |
| Condom use during sexual intercourse | Yes |
| No |
| History of Condom breakage | Yes |
| No |

**B. Awareness about PrEP:**

| **S.#** | **Questions** | **Response** |
| --- | --- | --- |
|  | Have you ever heard about PrEP (Pre-Exposure Prophylaxis)? | 1. **Yes** 2. **No** |
|  | What have you heard about PrEP? (Select the most appropriate) | 1. It is a medicine to prevent HIV 2. It is a cure for HIV 3. It is a form of emergency contraception 4. I don’t know |
|  | Where did you first hear about PrEP? | 1. Health worker 2. Friend/peer 3. Social media (e.g., Facebook, WhatsApp) 4. TV/Radio 5. NGO/Outreach program 6. Others (Specify)……. 7. I never heard about it |
| **4** | Do you know that PrEP is used to prevent HIV infection? | 1. Yes 2. No 3. Not sure |
| **5** | Do you know that PrEP is recommended for people at high risk of HIV infection? | 1. Yes 2. No 3. Not sure |
| **6** | Are you aware that PrEP must be taken daily to be effective? | 1. Yes 2. No 3. Not sure |
| **7** | Do you know where PrEP services are available in Mekelle? | 1. **Yes** 2. **No** |
| **8** | Which of the following best describes how PrEP is taken? | 1. One pill every day 2. Only before sex 3. Once a week 4. I don’t know |
| **9** | Do you think PrEP replaces the use of condoms? | 1. Yes 2. No 3. Not sure |
| **10** | Do you think PrEP protect against other sexually transmitted infections (STIs)? | 1. Yes 2. No |

**C. Utilization**

1. Have you ever used PrEP?

A. Yes **Q number 2** B. No

2. Are you currently taking PrEP?

A. Yes **Q number 4** B. No

3. If not taking PrEP, would you be willing to take it in the future?

A. Yes B. No C. Not sure

4. How often do you take your PrEP medication?

A. Daily B. Sometimes C. Only when I remember D. I have never taken it

5. Where did you get your PrEP medication from?

A. Government health facility B. Private clinic C. NGO outreach

D. Pharmacy E. Never taken

6. For how long have you been using PrEP?

A. Less than 1 month B. 1–6 months C. More than 6 months D. I don’t use it

7. Did you receive counseling before starting PrEP?

A. Yes B. No C. I don’t remember

8. Have you experienced any side effects while using PrEP?

A. Yes B. No C. Not sure

9. Have you ever stopped taking PrEP?

A. Yes **Q number 11** B. No

10. If yes, what was the reason for stopping PrEP?

A. Side effects B. felt no longer at risk

C. Forgot to take regularly D. couldn’t access it E. Other (specify)___________
